# Supplementary material
Source: Springer Nature journal article supplement (https://www.springermedizin.de/resource/supplementary/12885_2013_4292_MOESM4_ESM.pdf/9467640)

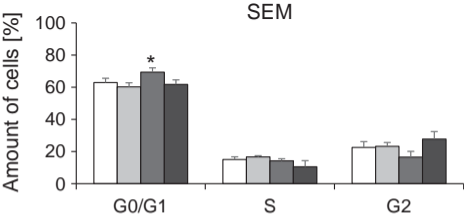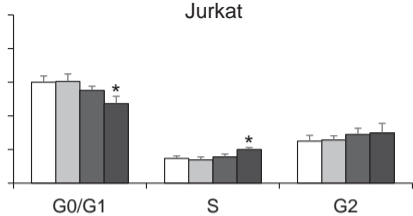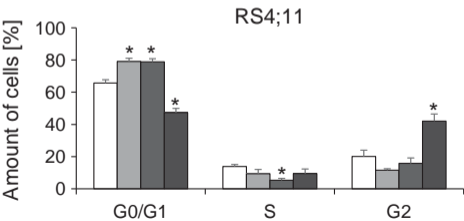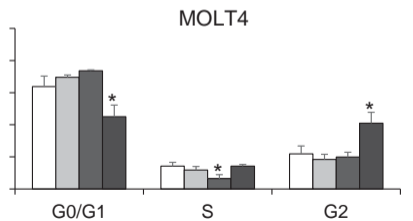

□ DMSO    □ 0.25  $\mu$ M    ■ 0.5  $\mu$ M    ■ 1  $\mu$ M

Supplement: MOESM4 [file 9467640]
